# Supplementary material
Source: PubMed Central journal article supplement (PMC2585505)

## SUPPORTING INFORMATION

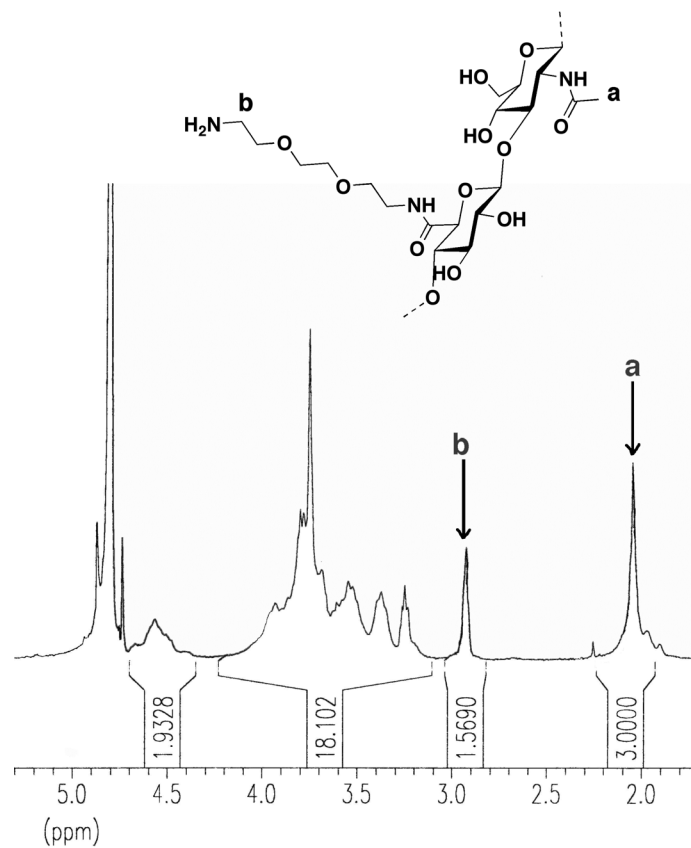

**Supporting Information, Figure 1.** <sup>1</sup>H NMR spectra of HA<sup>+</sup> in D<sub>2</sub>O (degree of substitution was calculated by integration of the methyl of acetamido moiety of GlcNAc residues resonance (**a**;  $\delta = 2.05$  ppm, 3H) relative to the methylene group near primary amine (**b**;  $\delta = 2.93$  ppm, 2H).

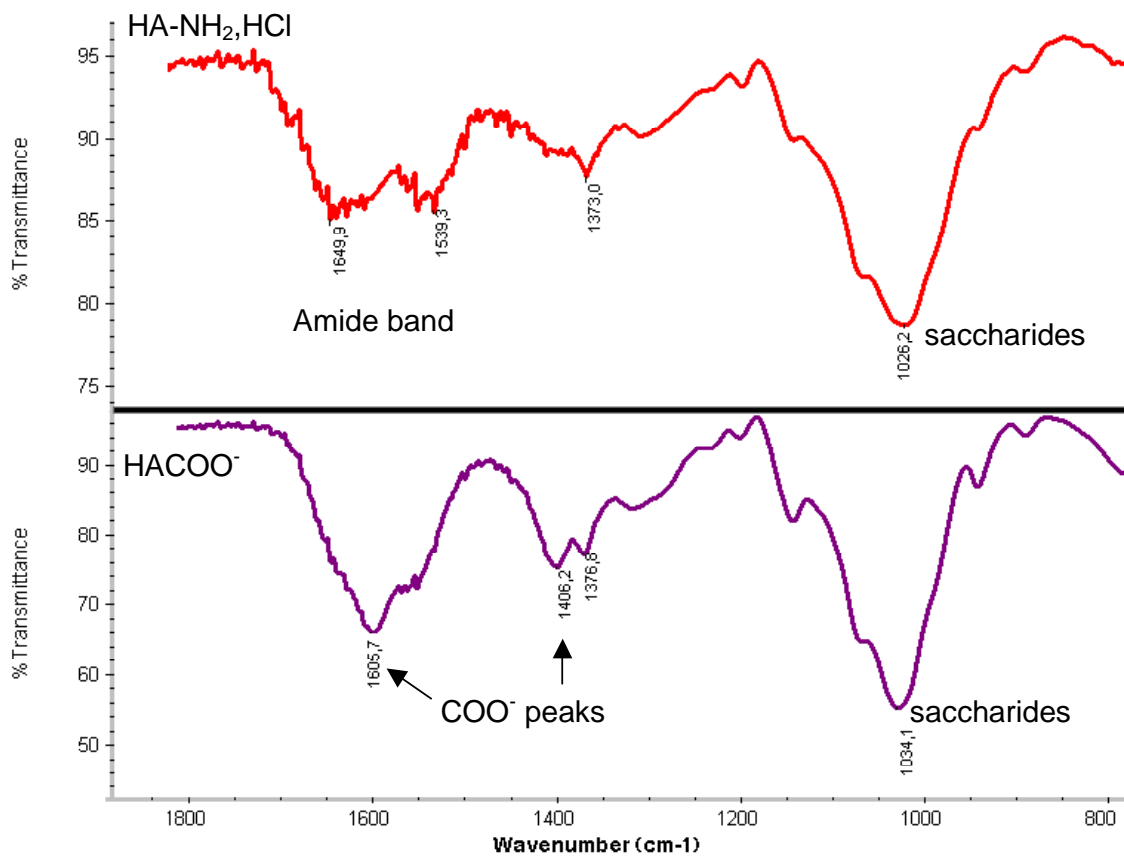

**Supporting information, Figure 2.** FTIR spectra (section 1800-800 cm<sup>-1</sup>) of the polymers HA (HACO<sub>2</sub>Na) and HA<sup>+</sup> (HAPeg<sub>2</sub>NH<sub>2</sub>Cl). The carboxylic peaks that are clearly seen on the anionic hyaluronan (lower curve) have been mostly transformed into amide bands (around 1500-1700 cm<sup>-1</sup>) in the cationic modified hyaluronan (upper curve).

**Supporting information, Figure 3.**

Reproducibility of the buildup of a PEI-(HA/HA<sup>+</sup>)<sub>10</sub> film measured by QCM experiments. The mean and standard deviation of two independent experiments is shown.

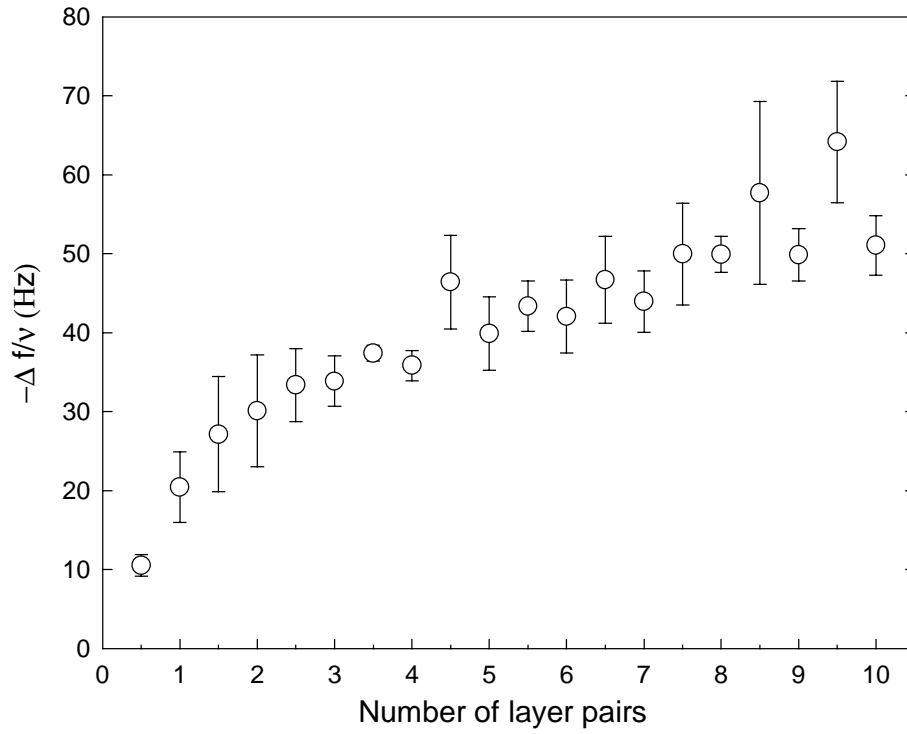

Supplement: NIHMS61834-supplement-si20061103_040.pdf [file NIHMS61834-supplement-si20061103_040.pdf]
